# Supplementary material for: Determination of growth-coupling strategies and their underlying principles
Source: BMC Bioinformatics. 2019 Aug 28;20:447. doi: 10.1186/s12859-019-2946-7 (PMC6714386; doi:10.1186/s12859-019-2946-7)
Supplement: Supplementary file 2 — GCS values for the identified GC strategies of all metabolites of the central carbon metabolism under aerobic conditions. GC strategies with different numbers of maximally allowable reaction deletions were computed using gcOpt with the E. coli iAF1260 core model. GCS values are additionally provided for an unconstrained ATP/ADP and NADH/NAD conversion, an unhindered proton translocation reaction, as well as combinations of these relaxations. The dataset includes the respective reaction and gene deletions for each identified strategy. (XLS 107 kb) [file 12859_2019_2946_MOESM2_ESM.xls]

## Sheet: GC strategies
Identified GC strategies for the aerobic condition
Includes biomass precursor availabilities and GCS values for three types of relaxations
For reaction and metabolite namespaces refer to BIGG Models (http://bigg.ucsd.edu/data_access)
	GCS
Metabolite ID	Standard	ATP/ADP relaxation	NADH/NAD relaxation	Proton translocation relaxation	ATP/ADP + Proton translocation relaxation	NADH/NAD + Proton translocation relaxation	NADH/NAD + ATP/ADP + Proton translocation relaxation	Precursor availability [%]	Reaction knockouts							Corresponding gene deletions (according to gene-reaction relation matrix in the E. coli iAF1260 core model, isozymes are thus included)
13dpg_c	0.176993	0.189096	0.414446	0.189096	0.189096	0.189096	0.189096	100	G6PDH2r	PPC	PYK					b1852	b3956	b1676	b1854
13dpg_c	0.197081	0.242217	0.416403	0.242217	0.242217	0.2304	0.2304	100	G6PDH2r	PPC	PYK	THD2				b1852	b1602	b1603	b3956	b1676	b1854
13dpg_c	0.318753	0.189096	0.414446	0.189096	0.189096	0.189096	0.189096	100	GND	PDH	PPC	PYK	SUCOAS			b0116	b2029	b0115	b0114	b3956	b1676	b1854	b0728	b0729
13dpg_c	0.314683	0.264539	0.403818	0.264539	0.264539	0.252336	0.252336	100	AKGDH	ME2	PPC	PYK	RPE	THD2		b0116	b0727	b0726	b2463	b1602	b1603	b3956	b1676	b1854	b4301	b3386
13dpg_c	0.314683	0.264539	0.403818	0.264539	0.264539	0.252336	0.252336	100	GLUSy	ME2	PPC	PYK	RPE	SUCOAS	THD2	b3213	b3212	b2463	b1602	b1603	b3956	b1676	b1854	b4301	b3386	b0728	b0729
2pg_c	-1.69992	0.107298	-1.99999	0.178978	0.107298	-2	-2	100	ATPS4r	PPC	PYK					b3733	b3739	b3735	b3734	b3738	b3736	b3732	b3737	b3731	b3956	b1676	b1854
2pg_c	0.390076	0.107298	-1.95775	0.171349	0.107298	-2	-2	100	ATPS4r	PPC	PTAr	PYK				b3733	b3739	b3735	b3734	b3738	b3736	b3732	b3737	b3731	b3956	b2297	b2458	b1676	b1854
2pg_c	0.419009	0.177649	-1.95447	0.218952	0.177649	-2	-2	100	ATPS4r	PFL	PPC	PTAr	PYK			b3733	b3739	b3735	b3734	b3738	b3736	b3732	b3737	b3731	b0903	b3952	b3114	b0902	b2579	b3951	b3956	b2297	b2458	b1676	b1854
2pg_c	0.418598	0.196704	0.253169	0.261087	0.196704	0.25996	0.178352	100	ATPS4r	PFL	PPC	PTAr	PYK	RPE		b3733	b3739	b3735	b3734	b3738	b3736	b3732	b3737	b3731	b0903	b3952	b3114	b0902	b2579	b3951	b3956	b2297	b2458	b1676	b1854	b4301	b3386
2pg_c	0.417807	0.195686	0.251456	0.259685	0.195686	0.258336	0.173052	100	ACKr	ATPS4r	LDH_D	PFL	PPC	PYK	TKT2	b3115	b1849	b2296	b3733	b3739	b3735	b3734	b3738	b3736	b3732	b3737	b3731	b2133	b1380	b0903	b3952	b3114	b0902	b2579	b3951	b3956	b1676	b1854	b2465	b2935
3pg_c	-1.69992	0.107298	-1.99999	0.178978	0.107298	-2	-2	100	ATPS4r	PPC	PYK					b3733	b3739	b3735	b3734	b3738	b3736	b3732	b3737	b3731	b3956	b1676	b1854
3pg_c	0.390076	0.107298	-1.95775	0.171349	0.107298	-2	-2	100	ATPS4r	PPC	PTAr	PYK				b3733	b3739	b3735	b3734	b3738	b3736	b3732	b3737	b3731	b3956	b2297	b2458	b1676	b1854
3pg_c	0.419009	0.177649	-1.95447	0.218952	0.177649	-2	-2	100	ATPS4r	PFL	PPC	PTAr	PYK			b3733	b3739	b3735	b3734	b3738	b3736	b3732	b3737	b3731	b0903	b3952	b3114	b0902	b2579	b3951	b3956	b2297	b2458	b1676	b1854
3pg_c	0.419009	0.177649	-1.95075	0.218952	0.177649	-2	-2	100	ACALD	ACKr	ATPS4r	PFL	PPC	PYK		b0351	b1241	b3115	b1849	b2296	b3733	b3739	b3735	b3734	b3738	b3736	b3732	b3737	b3731	b0903	b3952	b3114	b0902	b2579	b3951	b3956	b1676	b1854
3pg_c	0.419009	0.177649	-1.95075	0.218952	0.177649	-2	-2	100	ACKr	ALCD2x	ATPS4r	FRD7	PFL	PPC	PYK	b1241	b3115	b1849	b2296	b0356	b1478	b3733	b3739	b3735	b3734	b3738	b3736	b3732	b3737	b3731	b4151	b4152	b4154	b4153	b0903	b3952	b3114	b0902	b2579	b3951	b3956	b1676	b1854
6pgc_c	-1.64099	0.088676	-1.99999	0.162921	0.088676	-2	-2	100	ATPS4r	PPC	PYK					b3733	b3739	b3735	b3734	b3738	b3736	b3732	b3737	b3731	b3956	b1676	b1854
6pgc_c	-1.55638	0.150844	-1.99966	0.226088	0.150844	-2	-2	100	ATPS4r	PFL	PPC	PYK				b3733	b3739	b3735	b3734	b3738	b3736	b3732	b3737	b3731	b0903	b3952	b3114	b0902	b2579	b3951	b3956	b1676	b1854
6pgc_c	0.458082	0.179147	0.248057	0.267097	0.179147	0.264162	0.173052	100	ATPS4r	PFL	PPC	PYK	TKT2			b3733	b3739	b3735	b3734	b3738	b3736	b3732	b3737	b3731	b0903	b3952	b3114	b0902	b2579	b3951	b3956	b1676	b1854	b2465	b2935
6pgc_c	0.458082	0.179147	0.248057	0.267097	0.179147	0.264162	0.173052	100	ATPS4r	LDH_D	PFL	PPC	PYK	TKT2		b3733	b3739	b3735	b3734	b3738	b3736	b3732	b3737	b3731	b2133	b1380	b0903	b3952	b3114	b0902	b2579	b3951	b3956	b1676	b1854	b2465	b2935
6pgc_c	0.458082	0.179147	0.248057	0.267097	0.179147	0.264162	0.173052	100	ACALD	ALCD2x	ATPS4r	PFL	PPC	PYK	TKT2	b0351	b1241	b0356	b1478	b3733	b3739	b3735	b3734	b3738	b3736	b3732	b3737	b3731	b0903	b3952	b3114	b0902	b2579	b3951	b3956	b1676	b1854	b2465	b2935
6pgl_c	-1.6433	0.088676	-1.99999	0.162921	0.088676	-2	-2	100	ATPS4r	PPC	PYK					b3733	b3739	b3735	b3734	b3738	b3736	b3732	b3737	b3731	b3956	b1676	b1854
6pgl_c	-1.56004	0.150844	-1.9997	0.226088	0.150844	-2	-2	100	ATPS4r	PFL	PPC	PYK				b3733	b3739	b3735	b3734	b3738	b3736	b3732	b3737	b3731	b0903	b3952	b3114	b0902	b2579	b3951	b3956	b1676	b1854
6pgl_c	0.453763	0.179147	0.242552	0.267097	0.179147	0.264162	0.173052	100	ATPS4r	PFL	PPC	PYK	TKT2			b3733	b3739	b3735	b3734	b3738	b3736	b3732	b3737	b3731	b0903	b3952	b3114	b0902	b2579	b3951	b3956	b1676	b1854	b2465	b2935
6pgl_c	0.453763	0.179147	0.242552	0.267097	0.179147	0.264162	0.173052	100	ACALD	ATPS4r	PFL	PPC	PYK	TKT2		b0351	b1241	b3733	b3739	b3735	b3734	b3738	b3736	b3732	b3737	b3731	b0903	b3952	b3114	b0902	b2579	b3951	b3956	b1676	b1854	b2465	b2935
6pgl_c	0.453763	0.179147	0.242552	0.267097	0.179147	0.264162	0.173052	100	ACALD	ATPS4r	PFL	PPC	PYK	SUCOAS	TKT2	b0351	b1241	b3733	b3739	b3735	b3734	b3738	b3736	b3732	b3737	b3731	b0903	b3952	b3114	b0902	b2579	b3951	b3956	b1676	b1854	b0728	b0729	b2465	b2935
ac_c	-1.62912	-2	-1.73724	-2	-2	-2	-2	100	ACALD	CYTBD	LDH_D					b0351	b1241	b0734	b0978	b0733	b0979	b2133	b1380
ac_c	-1.66365	-2	-1.76521	-2	-2	-2	-2	100	ACALD	CYTBD	LDH_D	THD2				b0351	b1241	b0734	b0978	b0733	b0979	b2133	b1380	b1602	b1603
ac_c	-1.60062	-2	-1.73542	-1.99999	-2	-1.99999	-2	100	ACALD	CYTBD	GND	LDH_D	THD2			b0351	b1241	b0734	b0978	b0733	b0979	b2029	b2133	b1380	b1602	b1603
ac_c	-1.59235	-2	-1.72742	-1.99992	-2	-1.99992	-2	100	ACALD	CYTBD	GLUDy	LDH_D	PGL	THD2		b0351	b1241	b0734	b0978	b0733	b0979	b1761	b2133	b1380	b1602	b1603	b0767
ac_c	-1.59235	-2	-1.72742	-1.99992	-2	-1.99992	-2	100	ACALD	CYTBD	G6PDH2r	GLUDy	LDH_D	PDH	THD2	b0351	b1241	b0116	b0734	b0978	b0733	b0979	b1852	b1761	b2133	b1380	b1602	b1603	b0115	b0114
acald_c	0.794968	-2	-2	-2	-2	-2	-2	100	ALCD2x	LDH_D	NADH16					b1241	b0356	b1478	b2133	b1380	b2280	b2278	b2281	b2288	b2282	b2286	b2283	b2277	b2287	b2284	b2279	b2276	b2285
acald_c	0.809661	-2	-2	-1.99548	-2	-2	-2	0	ALCD2x	LDH_D	NADH16	THD2				b1241	b0356	b1478	b2133	b1380	b2280	b2278	b2281	b2288	b2282	b2286	b2283	b2277	b2287	b2284	b2279	b2276	b2285	b1602	b1603
acald_c	0.832576	-2	-2	0.0457699	-2	-2	-2	0	ALCD2x	GLUDy	LDH_D	NADH16	THD2			b1241	b0356	b1478	b1761	b2133	b1380	b2280	b2278	b2281	b2288	b2282	b2286	b2283	b2277	b2287	b2284	b2279	b2276	b2285	b1602	b1603
acald_c	0.832576	-2	-2	0.0457699	-2	-2	-2	0	ALCD2x	CYTBD	FUM	GLUDy	LDH_D	THD2		b1241	b0356	b1478	b0734	b0978	b0733	b0979	b1611	b4122	b1612	b1761	b2133	b1380	b1602	b1603
acald_c	0.832576	-2	-2	0.000467468	-2	-2	-2	0	ALCD2x	G6PDH2r	GLUDy	GND	LDH_D	NADH16	THD2	b1241	b0356	b1478	b1852	b1761	b2029	b2133	b1380	b2280	b2278	b2281	b2288	b2282	b2286	b2283	b2277	b2287	b2284	b2279	b2276	b2285	b1602	b1603
acon_C_c	0.472261	-2	0.304916	0.329771	-2	0.329771	-2	100	ATPS4r	FRD7	GLUDy	ME1	NADTRHD	PYK		b3733	b3739	b3735	b3734	b3738	b3736	b3732	b3737	b3731	b4151	b4152	b4154	b4153	b1761	b1479	b3962	b1602	b1603	b1676	b1854
acon_C_c	0.584641	-2	0.398975	0.438179	-2	0.438179	-2	100	ATPS4r	FRD7	GLUDy	ME1	NADTRHD	PYK	TKT2	b3733	b3739	b3735	b3734	b3738	b3736	b3732	b3737	b3731	b4151	b4152	b4154	b4153	b1761	b1479	b3962	b1602	b1603	b1676	b1854	b2465	b2935
akg_c	-0.516016	-0.598158	-0.720798	-0.598158	-0.598158	-0.710898	-0.710898	93.3333	G6PDH2r	ME2	SUCOAS	THD2				b1852	b2463	b1602	b1603	b0728	b0729
akg_c	-0.516016	-0.598158	-0.720798	-0.598158	-0.598158	-0.710898	-0.710898	93.3333	G6PDH2r	MDH	ME2	SUCOAS	THD2			b1852	b3236	b2463	b1602	b1603	b0728	b0729
akg_c	-0.693114	-0.935567	-0.858871	-0.935567	-0.935567	-0.852127	-0.852127	93.3333	ACALD	G6PDH2r	ME2	PPC	SUCOAS	THD2		b0351	b1241	b1852	b2463	b1602	b1603	b3956	b0728	b0729
akg_c	-0.123602	-0.598158	-0.722919	-0.598158	-0.598158	-0.710898	-0.710898	93.3333	ADK1	AKGDH	G6PDH2r	ME2	NADTRHD	PYK	THD2	b0474	b0116	b0727	b0726	b1852	b2463	b3962	b1602	b1603	b1676	b1854
cit_c	0.470292	-2	0.304916	0.329771	-2	0.329771	-2	100	ATPS4r	FRD7	GLUDy	ME1	NADTRHD	PYK		b3733	b3739	b3735	b3734	b3738	b3736	b3732	b3737	b3731	b4151	b4152	b4154	b4153	b1761	b1479	b3962	b1602	b1603	b1676	b1854
cit_c	0.582797	-2	0.398975	0.438179	-2	0.438179	-2	100	ATPS4r	FUM	GLUDy	ME1	NADTRHD	PYK	TKT2	b3733	b3739	b3735	b3734	b3738	b3736	b3732	b3737	b3731	b1611	b4122	b1612	b1761	b1479	b3962	b1602	b1603	b1676	b1854	b2465	b2935
dhap_c	0.39624	0.311932	0.354921	0.311932	0.311932	0.311932	0.311932	0	G6PDH2r	TPI						b1852	b3919
dhap_c	0.493241	0.311932	0.354921	0.311932	0.311932	0.311932	0.311932	0	FUM	G6PDH2r	TPI					b1611	b4122	b1612	b1852	b3919
dhap_c	0.563008	0.299467	0.349623	0.299467	0.299467	0.299467	0.299467	0	FUM	PDH	RPE	TPI				b0116	b1611	b4122	b1612	b0115	b0114	b4301	b3386	b3919
dhap_c	0.563008	0.299467	0.349623	0.299467	0.299467	0.299467	0.299467	0	FUM	MDH	PDH	RPE	TPI			b0116	b1611	b4122	b1612	b3236	b0115	b0114	b4301	b3386	b3919
dhap_c	0.563008	0.299467	0.346089	0.299467	0.299467	0.299467	0.299467	0	ACALD	AKGDH	FUM	PDH	RPE	TPI		b0351	b1241	b0116	b0727	b0726	b1611	b4122	b1612	b0115	b0114	b4301	b3386	b3919
dhap_c	0.577535	0.305699	0.35229	0.305699	0.305699	0.305699	0.305699	0	MALS	MDH	NADTRHD	PDH	PTAr	TALA	TPI	b0116	b4014	b2976	b3236	b3962	b1602	b1603	b0115	b0114	b2297	b2458	b2464	b0008	b3919
e4p_c	0.178899	0.124986	0.132455	0.124986	0.124986	0.124986	0.124986	100	PGI	TKT2						b4025	b2465	b2935
e4p_c	-1.63646	0.0745124	-2	0.12249	0.0745124	-2	-2	100	ATPS4r	PPC	PYK					b3733	b3739	b3735	b3734	b3738	b3736	b3732	b3737	b3731	b3956	b1676	b1854
e4p_c	0.510897	0.189096	0.266521	0.263971	0.189096	0.263971	0.189096	100	ATPS4r	G6PDH2r	PPC	PYK				b3733	b3739	b3735	b3734	b3738	b3736	b3732	b3737	b3731	b1852	b3956	b1676	b1854
e4p_c	0.510897	0.197165	0.266521	0.263971	0.189096	0.263971	0.189096	100	ATPS4r	PDH	PGL	PPC	PYK			b0116	b3733	b3739	b3735	b3734	b3738	b3736	b3732	b3737	b3731	b0115	b0114	b0767	b3956	b1676	b1854
e4p_c	0.510897	0.197165	0.266521	0.263971	0.189096	0.263971	0.189096	100	ATPS4r	G6PDH2r	NADTRHD	PDH	PPC	PYK		b0116	b3733	b3739	b3735	b3734	b3738	b3736	b3732	b3737	b3731	b1852	b3962	b1602	b1603	b0115	b0114	b3956	b1676	b1854
e4p_c	0.510897	0.189096	0.266521	0.263971	0.189096	0.263971	0.189096	100	ATPS4r	G6PDH2r	LDH_D	NADTRHD	PFL	PPC	PYK	b3733	b3739	b3735	b3734	b3738	b3736	b3732	b3737	b3731	b1852	b2133	b1380	b3962	b1602	b1603	b0903	b3952	b3114	b0902	b2579	b3951	b3956	b1676	b1854
etoh_c	-0.564273	-0.738394	-0.886538	-1.97483	-2	-2	-2	20	ATPS4r	NADH16						b3733	b3739	b3735	b3734	b3738	b3736	b3732	b3737	b3731	b2280	b2278	b2281	b2288	b2282	b2286	b2283	b2277	b2287	b2284	b2279	b2276	b2285
etoh_c	-0.365074	-0.67213	-0.886538	-1.97483	-2	-2	-2	20	ATPS4r	NADH16	PDH					b0116	b3733	b3739	b3735	b3734	b3738	b3736	b3732	b3737	b3731	b2280	b2278	b2281	b2288	b2282	b2286	b2283	b2277	b2287	b2284	b2279	b2276	b2285	b0115	b0114
etoh_c	-0.35382	-0.69278	-0.806491	-0.951087	-0.937517	-2	-2	6.66667	ATPS4r	NADH16	PDH	PPC				b0116	b3733	b3739	b3735	b3734	b3738	b3736	b3732	b3737	b3731	b2280	b2278	b2281	b2288	b2282	b2286	b2283	b2277	b2287	b2284	b2279	b2276	b2285	b0115	b0114	b3956
etoh_c	-0.347238	-0.697073	-0.811097	-0.940641	-0.9072	-2	-2	6.66667	ATPS4r	NADH16	PDH	PPC	TKT2			b0116	b3733	b3739	b3735	b3734	b3738	b3736	b3732	b3737	b3731	b2280	b2278	b2281	b2288	b2282	b2286	b2283	b2277	b2287	b2284	b2279	b2276	b2285	b0115	b0114	b3956	b2465	b2935
etoh_c	0.666361	0.464684	0.286889	-1.9325	-2	-2	-2	0	ATPS4r	CYTBD	FRD7	LDH_D	PTAr	PYK		b3733	b3739	b3735	b3734	b3738	b3736	b3732	b3737	b3731	b0734	b0978	b0733	b0979	b4151	b4152	b4154	b4153	b2133	b1380	b2297	b2458	b1676	b1854
etoh_c	-1.2452	-2	-1.63276	-2	-2	-2	-2	100	CYTBD	FRD7	GLUDy	LDH_D	ME2	PTAr	PYK	b0734	b0978	b0733	b0979	b4151	b4152	b4154	b4153	b1761	b2133	b1380	b2463	b2297	b2458	b1676	b1854
f6p_c	0.487184	0.490881	0.502777	0.490881	0.490881	0.490881	0.490881	0	FBA	PGI						b2097	b2925	b1773	b4025
f6p_c	0.585627	0.490881	0.502777	0.490881	0.490881	0.490881	0.490881	0	FBA	PGI	SUCDi					b2097	b2925	b1773	b4025	b0723	b0724	b0722	b0721
f6p_c	0.585627	0.490881	0.502777	0.490881	0.490881	0.490881	0.490881	0	FBA	ICL	PGI	SUCDi				b2097	b2925	b1773	b4015	b4025	b0723	b0724	b0722	b0721
f6p_c	0.585627	0.490881	0.502777	0.490881	0.490881	0.490881	0.490881	0	AKGDH	FBA	ICL	MDH	PGI			b0116	b0727	b0726	b2097	b2925	b1773	b4015	b3236	b4025
f6p_c	0.585627	0.490881	0.502777	0.490881	0.490881	0.490881	0.490881	0	FBA	FUM	ICL	LDH_D	PGI	TPI		b2097	b2925	b1773	b1611	b4122	b1612	b4015	b2133	b1380	b4025	b3919
f6p_c	0.586177	0.490881	0.465643	0.490881	0.490881	0.490881	0.490881	0	ACALD	ALCD2x	FBA	FUM	GLUSy	PFK	PGI	b0351	b1241	b0356	b1478	b2097	b2925	b1773	b1611	b4122	b1612	b3213	b3212	b3916	b1723	b4025
fdp_c	0.226147	0.189096	0.293162	0.189096	0.189096	0.189096	0.189096	100	G6PDH2r	PPC	PYK					b1852	b3956	b1676	b1854
fdp_c	0.301428	0.235957	0.287816	0.235957	0.235957	0.2304	0.2304	100	GND	PPC	PYK	THD2				b2029	b1602	b1603	b3956	b1676	b1854
fdp_c	-1.69239	-2	-2	0.06323	-2	-2	-2	100	AKGDH	ATPS4r	GLUDy	MDH	PYK			b0116	b0727	b0726	b3733	b3739	b3735	b3734	b3738	b3736	b3732	b3737	b3731	b1761	b3236	b1676	b1854
fdp_c	0.401258	-2	0.134612	0.116139	-2	0.116139	-2	100	ATPS4r	GLUDy	MDH	ME1	NADTRHD	PYK		b3733	b3739	b3735	b3734	b3738	b3736	b3732	b3737	b3731	b1761	b3236	b1479	b3962	b1602	b1603	b1676	b1854
fdp_c	0.406587	-2	0.134612	0.116139	-2	0.116139	-2	100	ADK1	ATPS4r	GLUDy	MDH	ME1	NADTRHD	PYK	b0474	b3733	b3739	b3735	b3734	b3738	b3736	b3732	b3737	b3731	b1761	b3236	b1479	b3962	b1602	b1603	b1676	b1854
for_c	-0.955848	-0.962623	-0.970377	-0.962623	-0.962623	-0.978115	-0.978115	80	PDH							b0116	b0115	b0114
for_c	-0.607712	-0.840942	-1.97527	-0.840942	-0.840942	-2	-2	100	NADH16	PPC						b2280	b2278	b2281	b2288	b2282	b2286	b2283	b2277	b2287	b2284	b2279	b2276	b2285	b3956
for_c	-0.406783	-0.723845	-0.939384	-0.922273	-0.962623	-0.952885	-0.978115	20	ATPS4r	NADH16	PDH					b0116	b3733	b3739	b3735	b3734	b3738	b3736	b3732	b3737	b3731	b2280	b2278	b2281	b2288	b2282	b2286	b2283	b2277	b2287	b2284	b2279	b2276	b2285	b0115	b0114
for_c	-0.384934	-0.730647	-0.895365	-0.887178	-0.840942	-0.939547	-0.933864	6.66667	ATPS4r	NADH16	PDH	PPC				b0116	b3733	b3739	b3735	b3734	b3738	b3736	b3732	b3737	b3731	b2280	b2278	b2281	b2288	b2282	b2286	b2283	b2277	b2287	b2284	b2279	b2276	b2285	b0115	b0114	b3956
for_c	-0.387243	-0.737747	-0.897826	-0.886113	-0.835293	-0.938547	-0.938041	6.66667	ATPS4r	NADH16	PDH	PPC	TKT2			b0116	b3733	b3739	b3735	b3734	b3738	b3736	b3732	b3737	b3731	b2280	b2278	b2281	b2288	b2282	b2286	b2283	b2277	b2287	b2284	b2279	b2276	b2285	b0115	b0114	b3956	b2465	b2935
for_c	-0.387243	-0.737747	-0.897847	-0.884887	-0.835293	-0.937467	-0.938041	6.66667	ATPS4r	GLUDy	NADH16	PDH	PPC	TKT2		b0116	b3733	b3739	b3735	b3734	b3738	b3736	b3732	b3737	b3731	b1761	b2280	b2278	b2281	b2288	b2282	b2286	b2283	b2277	b2287	b2284	b2279	b2276	b2285	b0115	b0114	b3956	b2465	b2935
for_c	-0.387243	-0.737747	-0.898676	-0.907441	-0.835293	-0.938547	-0.938041	6.66667	ATPS4r	ME2	NADH16	PDH	PPC	PTAr	TKT2	b0116	b3733	b3739	b3735	b3734	b3738	b3736	b3732	b3737	b3731	b2463	b2280	b2278	b2281	b2288	b2282	b2286	b2283	b2277	b2287	b2284	b2279	b2276	b2285	b0115	b0114	b3956	b2297	b2458	b2465	b2935
fum_c	-1.8702	-2	-2	-1.98579	-2	-2	-2	100	ATPS4r	FRD7	ME1	ME2	PYK			b3733	b3739	b3735	b3734	b3738	b3736	b3732	b3737	b3731	b4151	b4152	b4154	b4153	b1479	b2463	b1676	b1854
fum_c	0.100713	-2	0.026913	0.0247108	-2	0.0247108	-2	100	ATPS4r	FRD7	GLUDy	ME1	NADTRHD	PYK		b3733	b3739	b3735	b3734	b3738	b3736	b3732	b3737	b3731	b4151	b4152	b4154	b4153	b1761	b1479	b3962	b1602	b1603	b1676	b1854
fum_c	0.344874	-2	0.118844	0.116236	-2	0.116236	-2	100	ACKr	ATPS4r	FRD7	GLUDy	ME1	NADTRHD	PYK	b3115	b1849	b2296	b3733	b3739	b3735	b3734	b3738	b3736	b3732	b3737	b3731	b4151	b4152	b4154	b4153	b1761	b1479	b3962	b1602	b1603	b1676	b1854
g3p_c	0.226147	0.189096	0.293162	0.189096	0.189096	0.189096	0.189096	100	G6PDH2r	PPC	PYK					b1852	b3956	b1676	b1854
g3p_c	0.301428	0.235957	0.287816	0.235957	0.235957	0.2304	0.2304	100	G6PDH2r	PPC	PYK	THD2				b1852	b1602	b1603	b3956	b1676	b1854
g3p_c	-1.69239	-2	-2	0.06323	-2	-2	-2	100	ATPS4r	GLUDy	MDH	PYK	SUCOAS			b3733	b3739	b3735	b3734	b3738	b3736	b3732	b3737	b3731	b1761	b3236	b1676	b1854	b0728	b0729
g3p_c	0.401258	-2	0.134612	0.116139	-2	0.116139	-2	100	ATPS4r	GLUDy	MDH	ME1	NADTRHD	PYK		b3733	b3739	b3735	b3734	b3738	b3736	b3732	b3737	b3731	b1761	b3236	b1479	b3962	b1602	b1603	b1676	b1854
g3p_c	0.401788	-2	0.134612	0.116139	-2	0.116139	-2	100	ATPS4r	FRD7	GLUDy	ME1	ME2	NADTRHD	PYK	b3733	b3739	b3735	b3734	b3738	b3736	b3732	b3737	b3731	b4151	b4152	b4154	b4153	b1761	b1479	b2463	b3962	b1602	b1603	b1676	b1854
g6p_c	-1.66453	0.0745124	-1.99999	0.117869	0.0745124	-2	-2	100	ATPS4r	PPC	PYK					b3733	b3739	b3735	b3734	b3738	b3736	b3732	b3737	b3731	b3956	b1676	b1854
g6p_c	0.469082	0.189096	0.246653	0.266698	0.189096	0.266698	0.189096	100	ATPS4r	G6PDH2r	PPC	PYK				b3733	b3739	b3735	b3734	b3738	b3736	b3732	b3737	b3731	b1852	b3956	b1676	b1854
g6p_c	0.479967	0.189096	0.25277	0.25076	0.189096	0.25076	0.189096	100	ATPS4r	G6PDH2r	GLUDy	PPC	PYK			b3733	b3739	b3735	b3734	b3738	b3736	b3732	b3737	b3731	b1852	b1761	b3956	b1676	b1854
g6p_c	0.502108	0.235957	0.2447	0.272651	0.235957	0.272651	0.2304	100	ATPS4r	G6PDH2r	PPC	PYK	SUCOAS	THD2		b3733	b3739	b3735	b3734	b3738	b3736	b3732	b3737	b3731	b1852	b1602	b1603	b3956	b1676	b1854	b0728	b0729
g6p_c	0.497737	0.226967	0.263551	0.263225	0.226967	0.263225	0.221871	100	AKGDH	ATPS4r	GLUDy	PPC	PYK	RPE	THD2	b0116	b0727	b0726	b3733	b3739	b3735	b3734	b3738	b3736	b3732	b3737	b3731	b1761	b1602	b1603	b3956	b1676	b1854	b4301	b3386
glu__L_c	0.384959	-2	0.408335	0.386285	-2	0.386285	-2	100	ATPS4r	FRD7	ME1	NADTRHD	PYK			b3733	b3739	b3735	b3734	b3738	b3736	b3732	b3737	b3731	b4151	b4152	b4154	b4153	b1479	b3962	b1602	b1603	b1676	b1854
glu__L_c	0.616476	-2	0.652909	0.716312	-2	0.733435	-2	100	ACKr	ATPS4r	FUM	ME1	NADTRHD	PYK		b3115	b1849	b2296	b3733	b3739	b3735	b3734	b3738	b3736	b3732	b3737	b3731	b1611	b4122	b1612	b1479	b3962	b1602	b1603	b1676	b1854
glu__L_c	0.675399	-2	0.679279	0.74592	-2	0.763057	-2	100	ACKr	ATPS4r	FRD7	ME1	NADTRHD	PYK	TKT2	b3115	b1849	b2296	b3733	b3739	b3735	b3734	b3738	b3736	b3732	b3737	b3731	b4151	b4152	b4154	b4153	b1479	b3962	b1602	b1603	b1676	b1854	b2465	b2935
glx_c	-0.999037	-0.999818	-0.999995	-0.999818	-0.999818	-0.999939	-0.999939	100	G6PDH2r	MALS	MDH	PYK	SUCOAS			b1852	b4014	b2976	b3236	b1676	b1854	b0728	b0729
glx_c	0.477155	-2	0.0935928	0.318884	-2	0.0824427	-2	100	ATPS4r	FRD7	GLUDy	ME1	NADTRHD	PYK		b3733	b3739	b3735	b3734	b3738	b3736	b3732	b3737	b3731	b4151	b4152	b4154	b4153	b1761	b1479	b3962	b1602	b1603	b1676	b1854
glx_c	0.590443	-2	0.120997	0.426182	-2	0.109545	-2	100	ATPS4r	FRD7	GLUDy	ME1	NADTRHD	PYK	TKT2	b3733	b3739	b3735	b3734	b3738	b3736	b3732	b3737	b3731	b4151	b4152	b4154	b4153	b1761	b1479	b3962	b1602	b1603	b1676	b1854	b2465	b2935
icit_c	0.472261	-2	0.304916	0.329771	-2	0.329771	-2	100	ATPS4r	FRD7	GLUDy	ME1	NADTRHD	PYK		b3733	b3739	b3735	b3734	b3738	b3736	b3732	b3737	b3731	b4151	b4152	b4154	b4153	b1761	b1479	b3962	b1602	b1603	b1676	b1854
icit_c	0.584641	-2	0.398975	0.438179	-2	0.438179	-2	100	ATPS4r	FRD7	GLUDy	ME1	NADTRHD	PYK	TKT2	b3733	b3739	b3735	b3734	b3738	b3736	b3732	b3737	b3731	b4151	b4152	b4154	b4153	b1761	b1479	b3962	b1602	b1603	b1676	b1854	b2465	b2935
lac__D_c	0.708451	-2	-2	-2	-2	-2	-2	100	ACALD	NADH16						b0351	b1241	b2280	b2278	b2281	b2288	b2282	b2286	b2283	b2277	b2287	b2284	b2279	b2276	b2285
lac__D_c	0.728314	-2	-2	-1.99562	-2	-2	-2	0	ACALD	NADH16	THD2					b0351	b1241	b2280	b2278	b2281	b2288	b2282	b2286	b2283	b2277	b2287	b2284	b2279	b2276	b2285	b1602	b1603
lac__D_c	0.7476	-2	-2	0.0443232	-2	-2	-2	0	ACALD	GLUDy	NADH16	THD2				b0351	b1241	b1761	b2280	b2278	b2281	b2288	b2282	b2286	b2283	b2277	b2287	b2284	b2279	b2276	b2285	b1602	b1603
lac__D_c	0.748656	-2	-1.79474	0.0443232	-2	-2	-2	0	ACALD	GLUDy	NADH16	PTAr	THD2			b0351	b1241	b1761	b2280	b2278	b2281	b2288	b2282	b2286	b2283	b2277	b2287	b2284	b2279	b2276	b2285	b1602	b1603	b2297	b2458
lac__D_c	0.748229	-2	-1.83352	0.0459543	-2	-2	-2	0	ACALD	G6PDH2r	GLUDy	NADH16	PTAr	THD2		b0351	b1241	b1852	b1761	b2280	b2278	b2281	b2288	b2282	b2286	b2283	b2277	b2287	b2284	b2279	b2276	b2285	b1602	b1603	b2297	b2458
lac__D_c	0.748656	-2	-1.75672	0.0443232	-2	-2	-2	0	ACALD	ALCD2x	CYTBD	FRD7	GLUDy	PTAr	THD2	b0351	b1241	b0356	b1478	b0734	b0978	b0733	b0979	b4151	b4152	b4154	b4153	b1761	b1602	b1603	b2297	b2458
mal__L_c	-1.86888	-2	-2	-1.98579	-2	-2	-2	100	ATPS4r	FRD7	ME1	ME2	PYK			b3733	b3739	b3735	b3734	b3738	b3736	b3732	b3737	b3731	b4151	b4152	b4154	b4153	b1479	b2463	b1676	b1854
mal__L_c	0.105506	-2	0.025542	0.0247108	-2	0.0247108	-2	100	ATPS4r	FUM	GLUDy	ME1	NADTRHD	PYK		b3733	b3739	b3735	b3734	b3738	b3736	b3732	b3737	b3731	b1611	b4122	b1612	b1761	b1479	b3962	b1602	b1603	b1676	b1854
mal__L_c	0.340766	-2	0.115799	0.116236	-2	0.116236	-2	100	ACKr	ATPS4r	FRD7	GLUDy	ME1	NADTRHD	PYK	b3115	b1849	b2296	b3733	b3739	b3735	b3734	b3738	b3736	b3732	b3737	b3731	b4151	b4152	b4154	b4153	b1761	b1479	b3962	b1602	b1603	b1676	b1854
oaa_c	-1.7976	-2	-2	-1.95982	-2	-2	-2	100	ATPS4r	MDH	PYK					b3733	b3739	b3735	b3734	b3738	b3736	b3732	b3737	b3731	b3236	b1676	b1854
oaa_c	-1.75571	-2	-2	0.0819118	-2	-2	-2	100	ATPS4r	MDH	PGI	PYK				b3733	b3739	b3735	b3734	b3738	b3736	b3732	b3737	b3731	b3236	b4025	b1676	b1854
oaa_c	-1.74967	-2	-2	0.0825789	-2	-2	-2	100	ACKr	ATPS4r	MDH	PFL	PYK			b3115	b1849	b2296	b3733	b3739	b3735	b3734	b3738	b3736	b3732	b3737	b3731	b3236	b0903	b3952	b3114	b0902	b2579	b3951	b1676	b1854
oaa_c	-1.73891	-2	-2	0.112048	-2	-2	-2	100	ACKr	ATPS4r	GLUDy	MDH	PFL	PYK		b3115	b1849	b2296	b3733	b3739	b3735	b3734	b3738	b3736	b3732	b3737	b3731	b1761	b3236	b0903	b3952	b3114	b0902	b2579	b3951	b1676	b1854
oaa_c	0.309067	-2	0.118844	0.116236	-2	0.116236	-2	100	ACKr	ATPS4r	FRD7	GLUDy	ME1	NADTRHD	PYK	b3115	b1849	b2296	b3733	b3739	b3735	b3734	b3738	b3736	b3732	b3737	b3731	b4151	b4152	b4154	b4153	b1761	b1479	b3962	b1602	b1603	b1676	b1854
pep_c	-1.69992	0.107298	-1.99999	0.178978	0.107298	-2	-2	100	ATPS4r	PPC	PYK					b3733	b3739	b3735	b3734	b3738	b3736	b3732	b3737	b3731	b3956	b1676	b1854
pep_c	0.390076	0.107298	-1.95775	0.171349	0.107298	-2	-2	100	ATPS4r	PPC	PTAr	PYK				b3733	b3739	b3735	b3734	b3738	b3736	b3732	b3737	b3731	b3956	b2297	b2458	b1676	b1854
pep_c	0.419009	0.177649	-1.95447	0.218952	0.177649	-2	-2	100	ATPS4r	PFL	PPC	PTAr	PYK			b3733	b3739	b3735	b3734	b3738	b3736	b3732	b3737	b3731	b0903	b3952	b3114	b0902	b2579	b3951	b3956	b2297	b2458	b1676	b1854
pep_c	0.419393	0.198542	0.254894	0.262502	0.198542	0.261587	0.183716	100	ATPS4r	PFL	PPC	PTAr	PYK	TALA		b3733	b3739	b3735	b3734	b3738	b3736	b3732	b3737	b3731	b0903	b3952	b3114	b0902	b2579	b3951	b3956	b2297	b2458	b1676	b1854	b2464	b0008
pep_c	0.431601	0.190161	0.265492	0.260028	0.190161	0.289226	0.110677	100	ACALD	ATPS4r	NADTRHD	PFL	PPC	PTAr	PYK	b0351	b1241	b3733	b3739	b3735	b3734	b3738	b3736	b3732	b3737	b3731	b3962	b1602	b1603	b0903	b3952	b3114	b0902	b2579	b3951	b3956	b2297	b2458	b1676	b1854
pyr_c	-1.5537	-2	-1.9917	-1.86641	-2	-2	-2	100	ACALD	ACKr	ATPS4r	LDH_D	MALS			b0351	b1241	b3115	b1849	b2296	b3733	b3739	b3735	b3734	b3738	b3736	b3732	b3737	b3731	b2133	b1380	b4014	b2976
pyr_c	-1.47358	-2	-1.98451	-2	-2	-2	-2	100	ACALD	ATPS4r	LDH_D	PFL	PPC	PTAr		b0351	b1241	b3733	b3739	b3735	b3734	b3738	b3736	b3732	b3737	b3731	b2133	b1380	b0903	b3952	b3114	b0902	b2579	b3951	b3956	b2297	b2458
pyr_c	0.577744	-2	0.245474	0.338811	-2	0.246331	-2	100	ACALD	ACKr	ATPS4r	GLUDy	LDH_D	MALS	NADTRHD	b0351	b1241	b3115	b1849	b2296	b3733	b3739	b3735	b3734	b3738	b3736	b3732	b3737	b3731	b1761	b2133	b1380	b4014	b2976	b3962	b1602	b1603
r5p_c	-1.65262	0.0745124	-2	0.133165	0.0745124	-2	-2	100	ATPS4r	PPC	PYK					b3733	b3739	b3735	b3734	b3738	b3736	b3732	b3737	b3731	b3956	b1676	b1854
r5p_c	0.479043	0.189096	0.245234	0.245917	0.189096	0.245917	0.189096	100	ATPS4r	G6PDH2r	PPC	PYK				b3733	b3739	b3735	b3734	b3738	b3736	b3732	b3737	b3731	b1852	b3956	b1676	b1854
r5p_c	0.48872	0.189096	0.25438	0.285712	0.189096	0.285712	0.189096	100	ATPS4r	G6PDH2r	GLUDy	PPC	PYK			b3733	b3739	b3735	b3734	b3738	b3736	b3732	b3737	b3731	b1852	b1761	b3956	b1676	b1854
r5p_c	0.48872	0.189096	0.25438	0.285712	0.189096	0.285712	0.189096	100	ATPS4r	G6PDH2r	GLUDy	PFL	PPC	PYK		b3733	b3739	b3735	b3734	b3738	b3736	b3732	b3737	b3731	b1852	b1761	b0903	b3952	b3114	b0902	b2579	b3951	b3956	b1676	b1854
r5p_c	0.48872	0.197482	0.25438	0.285712	0.189096	0.285712	0.189096	100	ATPS4r	GLUDy	ME1	PDH	PGL	PPC	PYK	b0116	b3733	b3739	b3735	b3734	b3738	b3736	b3732	b3737	b3731	b1761	b1479	b0115	b0114	b0767	b3956	b1676	b1854
ru5p__D_c	-0.986894	-0.969187	-0.990226	-0.969187	-0.969187	-0.969187	-0.969187	86.6667	RPI							b2914	b4090
ru5p__D_c	-0.964284	-0.969187	-0.998744	-0.969187	-0.969187	-0.969187	-0.969187	86.6667	CYTBD	RPI						b0734	b0978	b0733	b0979	b2914	b4090
ru5p__D_c	-1.65262	0.0745124	-2	0.133165	0.0745124	-2	-2	100	ATPS4r	PPC	PYK					b3733	b3739	b3735	b3734	b3738	b3736	b3732	b3737	b3731	b3956	b1676	b1854
ru5p__D_c	0.479043	0.189096	0.245234	0.245917	0.189096	0.245917	0.189096	100	ATPS4r	G6PDH2r	PPC	PYK				b3733	b3739	b3735	b3734	b3738	b3736	b3732	b3737	b3731	b1852	b3956	b1676	b1854
ru5p__D_c	0.48872	0.189096	0.25438	0.285712	0.189096	0.285712	0.189096	100	ATPS4r	GLUDy	GND	PPC	PYK			b3733	b3739	b3735	b3734	b3738	b3736	b3732	b3737	b3731	b1761	b2029	b3956	b1676	b1854
ru5p__D_c	0.48872	0.189096	0.25438	0.285712	0.189096	0.285712	0.189096	100	ATPS4r	GLUDy	PFL	PGL	PPC	PYK		b3733	b3739	b3735	b3734	b3738	b3736	b3732	b3737	b3731	b1761	b0903	b3952	b3114	b0902	b2579	b3951	b0767	b3956	b1676	b1854
ru5p__D_c	0.48872	0.189096	0.25438	0.285712	0.189096	0.285712	0.189096	100	ACALD	ATPS4r	G6PDH2r	GLUDy	PPC	PYK	SUCOAS	b0351	b1241	b3733	b3739	b3735	b3734	b3738	b3736	b3732	b3737	b3731	b1852	b1761	b3956	b1676	b1854	b0728	b0729
s7p_c	0.368476	0.385205	0.373431	0.385205	0.385205	0.385205	0.385205	0	PGI	TALA						b4025	b2464	b0008
s7p_c	0.424699	0.385205	0.373431	0.385205	0.385205	0.385205	0.385205	0	FUM	PGI	TALA					b1611	b4122	b1612	b4025	b2464	b0008
s7p_c	0.44616	0.189096	0.255967	0.281119	0.189096	0.281119	0.189096	100	ATPS4r	G6PDH2r	PPC	PYK				b3733	b3739	b3735	b3734	b3738	b3736	b3732	b3737	b3731	b1852	b3956	b1676	b1854
s7p_c	0.457052	0.189096	0.24085	0.264517	0.189096	0.264517	0.189096	100	ATPS4r	GLUDy	GND	PPC	PYK			b3733	b3739	b3735	b3734	b3738	b3736	b3732	b3737	b3731	b1761	b2029	b3956	b1676	b1854
s7p_c	0.477108	0.235957	0.25639	0.288011	0.235957	0.288011	0.2304	100	ATPS4r	G6PDH2r	PPC	PYK	SUCOAS	THD2		b3733	b3739	b3735	b3734	b3738	b3736	b3732	b3737	b3731	b1852	b1602	b1603	b3956	b1676	b1854	b0728	b0729
s7p_c	0.487024	0.235957	0.243676	0.273729	0.235957	0.273729	0.2304	100	ATPS4r	GLUDy	GND	PPC	PYK	SUCOAS	THD2	b3733	b3739	b3735	b3734	b3738	b3736	b3732	b3737	b3731	b1761	b2029	b1602	b1603	b3956	b1676	b1854	b0728	b0729
succ_c	-0.969122	-0.956363	-2	-0.956363	-0.956363	-2	-2	100	CYTBD	PFL						b0734	b0978	b0733	b0979	b0903	b3952	b3114	b0902	b2579	b3951
succ_c	0.426628	-2	-2	-2	-2	-2	-2	100	ACALD	CYTBD	LDH_D					b0351	b1241	b0734	b0978	b0733	b0979	b2133	b1380
succ_c	0.5121	-2	-2	-1.99743	-2	-2	-2	0	ACALD	CYTBD	LDH_D	THD2				b0351	b1241	b0734	b0978	b0733	b0979	b2133	b1380	b1602	b1603
succ_c	0.514708	0.399251	-2	0.399251	0.399251	-2	-2	0	ACALD	CYTBD	LDH_D	ME2	THD2			b0351	b1241	b0734	b0978	b0733	b0979	b2133	b1380	b2463	b1602	b1603
succ_c	0.513385	0.399251	-2	0.399251	0.399251	-2	-2	0	ACALD	CYTBD	GLUDy	LDH_D	ME2	THD2		b0351	b1241	b0734	b0978	b0733	b0979	b1761	b2133	b1380	b2463	b1602	b1603
succ_c	0.513385	0.399251	-2	0.399251	0.399251	-2	-2	0	ACALD	CYTBD	GLUDy	LDH_D	ME2	SUCOAS	THD2	b0351	b1241	b0734	b0978	b0733	b0979	b1761	b2133	b1380	b2463	b1602	b1603	b0728	b0729
xu5p__D_c	-0.986894	-0.969187	-0.990226	-0.969187	-0.969187	-0.969187	-0.969187	86.6667	RPI							b2914	b4090
xu5p__D_c	-0.964284	-0.969187	-0.998744	-0.969187	-0.969187	-0.969187	-0.969187	86.6667	NADH16	RPI						b2280	b2278	b2281	b2288	b2282	b2286	b2283	b2277	b2287	b2284	b2279	b2276	b2285	b2914	b4090
xu5p__D_c	-1.65262	0.0745124	-2	0.133165	0.0745124	-2	-2	100	ATPS4r	PPC	PYK					b3733	b3739	b3735	b3734	b3738	b3736	b3732	b3737	b3731	b3956	b1676	b1854
xu5p__D_c	0.479043	0.189096	0.245234	0.245917	0.189096	0.245917	0.189096	100	ATPS4r	G6PDH2r	PPC	PYK				b3733	b3739	b3735	b3734	b3738	b3736	b3732	b3737	b3731	b1852	b3956	b1676	b1854
xu5p__D_c	0.48872	0.189096	0.25438	0.285712	0.189096	0.285712	0.189096	100	ATPS4r	G6PDH2r	GLUDy	PPC	PYK			b3733	b3739	b3735	b3734	b3738	b3736	b3732	b3737	b3731	b1852	b1761	b3956	b1676	b1854
xu5p__D_c	0.48872	0.235957	0.25438	0.285712	0.235957	0.285712	0.2304	100	ATPS4r	G6PDH2r	GLUDy	PPC	PYK	THD2		b3733	b3739	b3735	b3734	b3738	b3736	b3732	b3737	b3731	b1852	b1761	b1602	b1603	b3956	b1676	b1854
xu5p__D_c	0.48872	0.189096	0.25438	0.285712	0.189096	0.285712	0.189096	100	ATPS4r	GLUDy	GND	NADTRHD	PPC	PYK	SUCOAS	b3733	b3739	b3735	b3734	b3738	b3736	b3732	b3737	b3731	b1761	b2029	b3962	b1602	b1603	b3956	b1676	b1854	b0728	b0729
